# Supplementary material for: Graphite@silicon embedded in a carbon conformally coated tiny SiO2nanoparticle matrix for high-performance lithium-ion batteries
Source: Royal Society of Chemistry journal article supplement (doi:10.1039/d1qi00618e), 2021-01-01
Supplement: d1qi00618e1.pdf [file d1qi00618e1.pdf]

## Supporting Information

### **Graphite@Silicon embedded in Carbon Conformally Coated Tiny SiO<sub>2</sub> Nanoparticles Matrix for High-Performance Lithium-Ion Batteries**

Huitian Liu<sup>a</sup>, Xu Liu<sup>a</sup>, Zhaolin Liu<sup>b</sup>, Junyan Tao<sup>a</sup>, Xiaoqian Dai<sup>a</sup>, Qi Yang<sup>a</sup>, Jikai Xu<sup>a</sup>,  
Zhongqiang Shan<sup>a,\*</sup>

<sup>a</sup>School of Chemical Engineering and Technology, Tianjin University, Tianjin 300350, China

<sup>b</sup> Institute of Materials Research and Engineering (IMRE), A\*STAR (Agency for Science,  
Technology and Research), 2 Fusionopolis Way, Innovis #08-03, 138634, Singapore.

E-mail: [shanzq@tju.edu.cn](mailto:shanzq@tju.edu.cn)

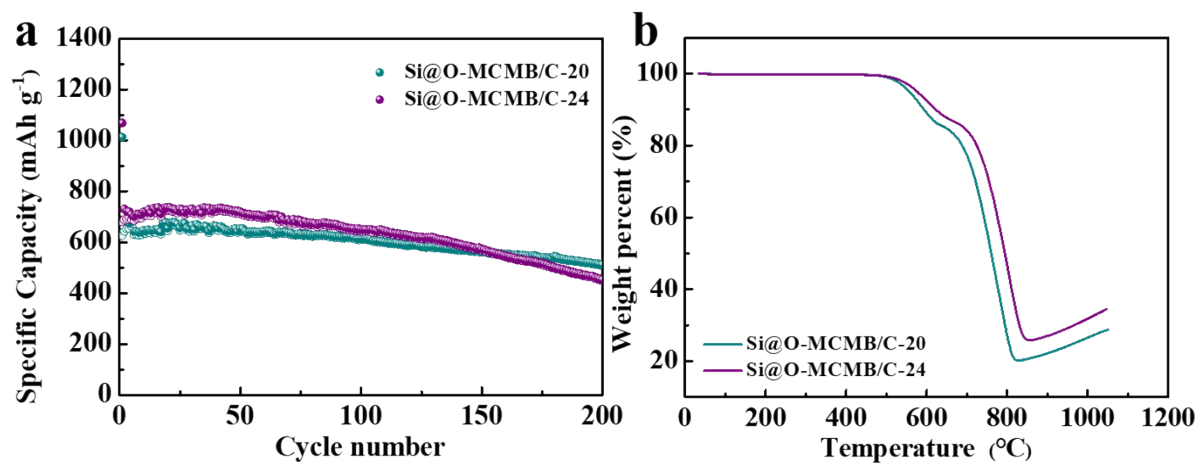

**Figure S1** (a) Cycling performances of Si@O-MCMB/C with different Si contents. (b) TGA curves under an oxygen atmosphere, where the Si@O-MCMB/C composites with 20 and 24 wt% Si content are denoted as Si@O-MCMB/C-20 and Si@O-MCMB/C-24.

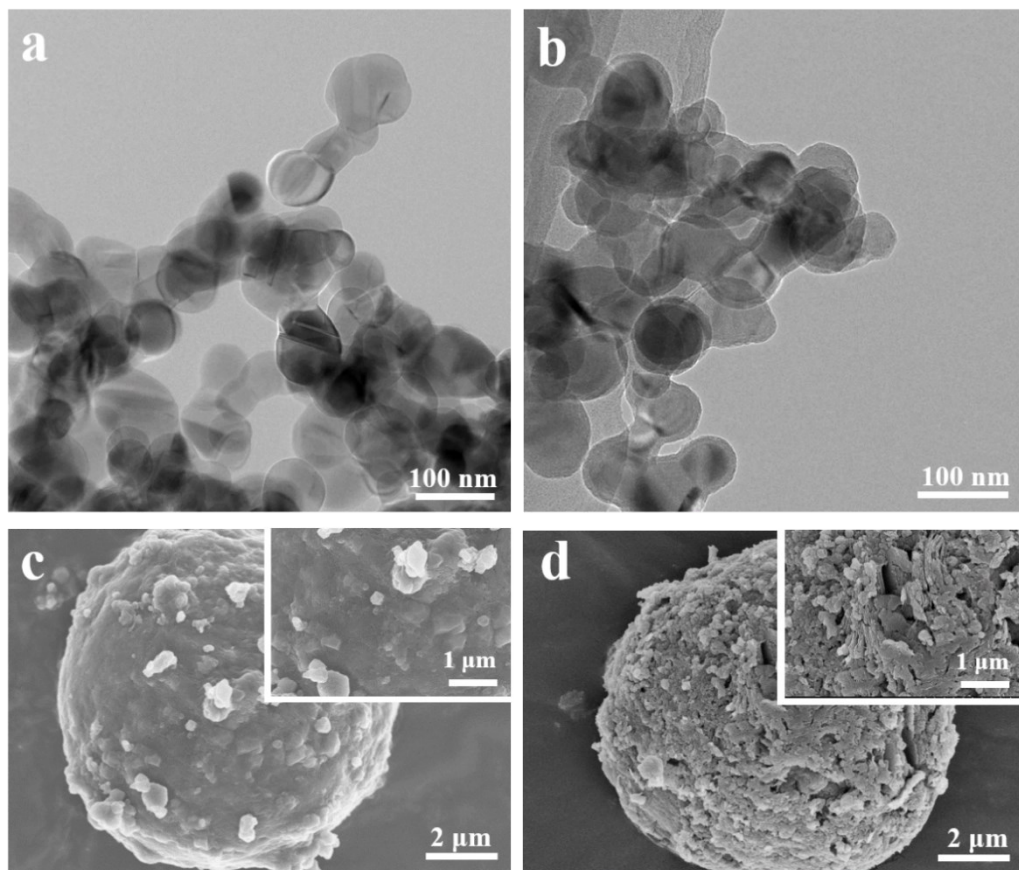

**Figure S2** TEM images of (a) pure Si and (b) Si-PDDA. SEM images of (c) graphite and (d) graphite after being treated by mixed acid. A polymer layer is observed for Si-PDDA particles, indicating the successful modification of Si NPs by PDDA. After mixed acid oxidation, the graphite shows a relatively rough surface, which was generated by the positively charged Si-PDDA and negatively charged graphite through electrostatic attraction.

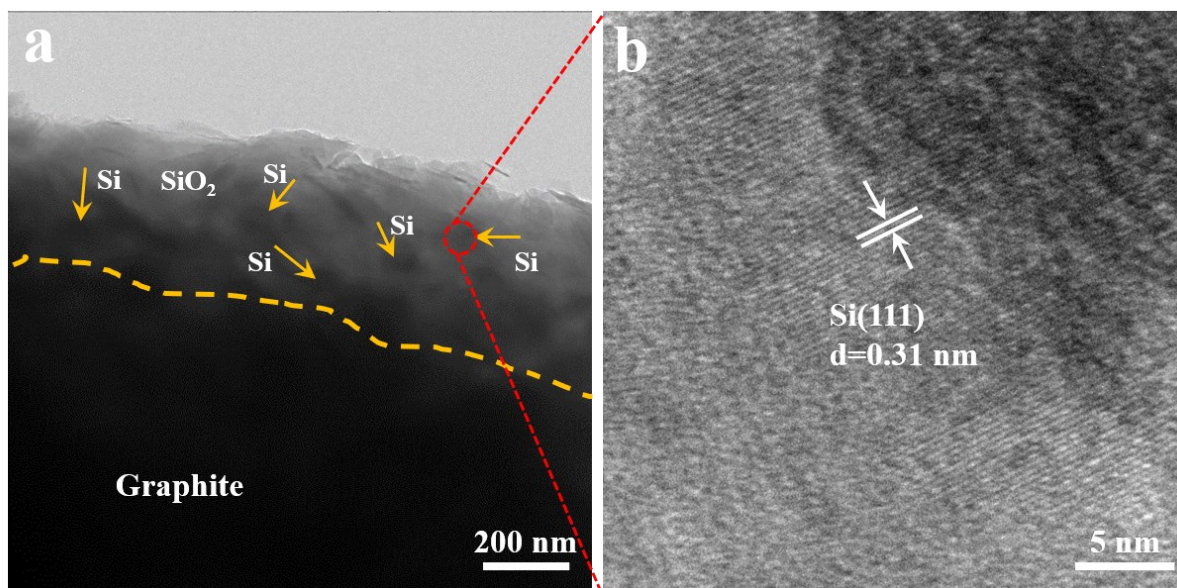

**Figure S3** (a) TEM and (b) HRTEM images of G/Si/SiO<sub>2</sub> layer. The TEM images in Figure S3 further verify that the crystalline SiNPs are well encapsulated in the SiO<sub>2</sub> matrix with a thickness of about 400 nm deposited on the graphite skeleton.

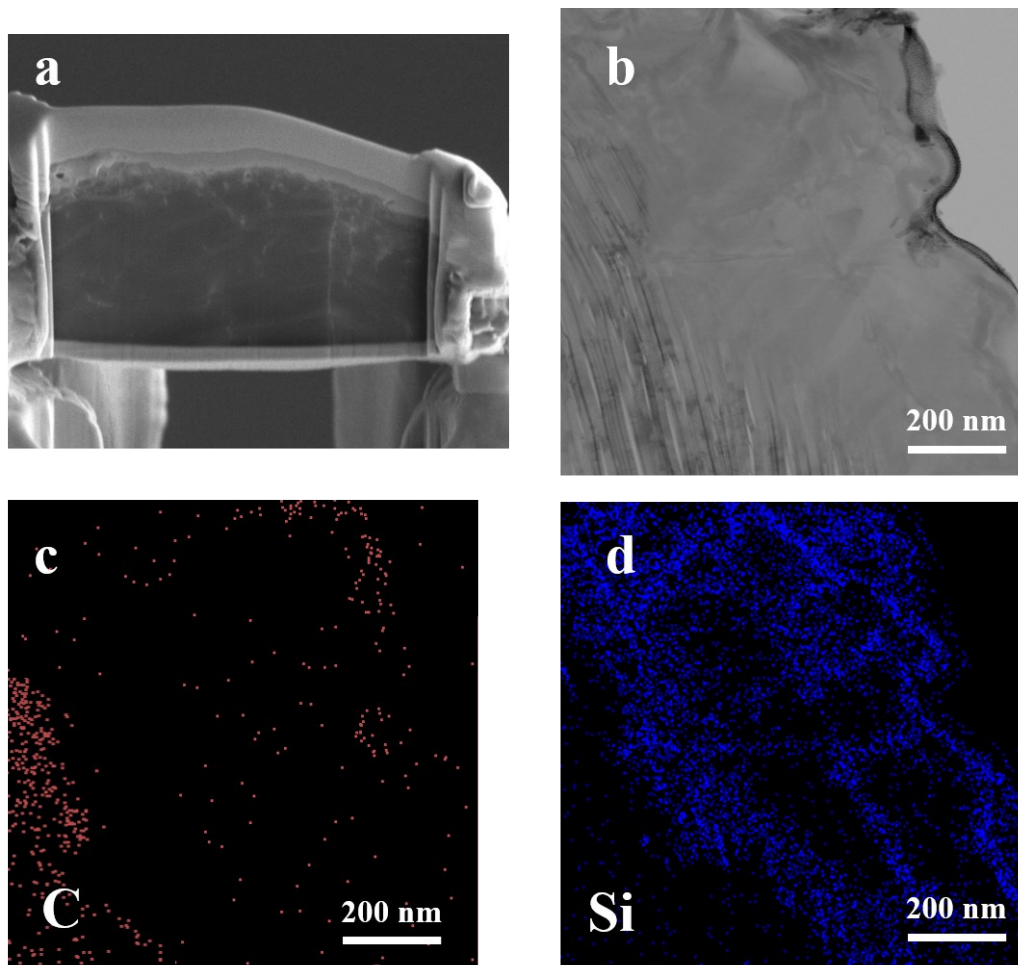

**Figure S4** (a) SEM image, (b) TEM and (c and d) EDS of G@Si/SiO<sub>2</sub> layer/C in cross-sectional view.

TEM and corresponding EDS images are conducted after cutting the G@Si/SiO<sub>2</sub> layer/C by Dual-Beam Focus Ion Beam System (FIB). It can be seen that the carbon shell on the outmost layer of the G@Si/SiO<sub>2</sub> layer/C microsphere is isolated from the inner graphite core.

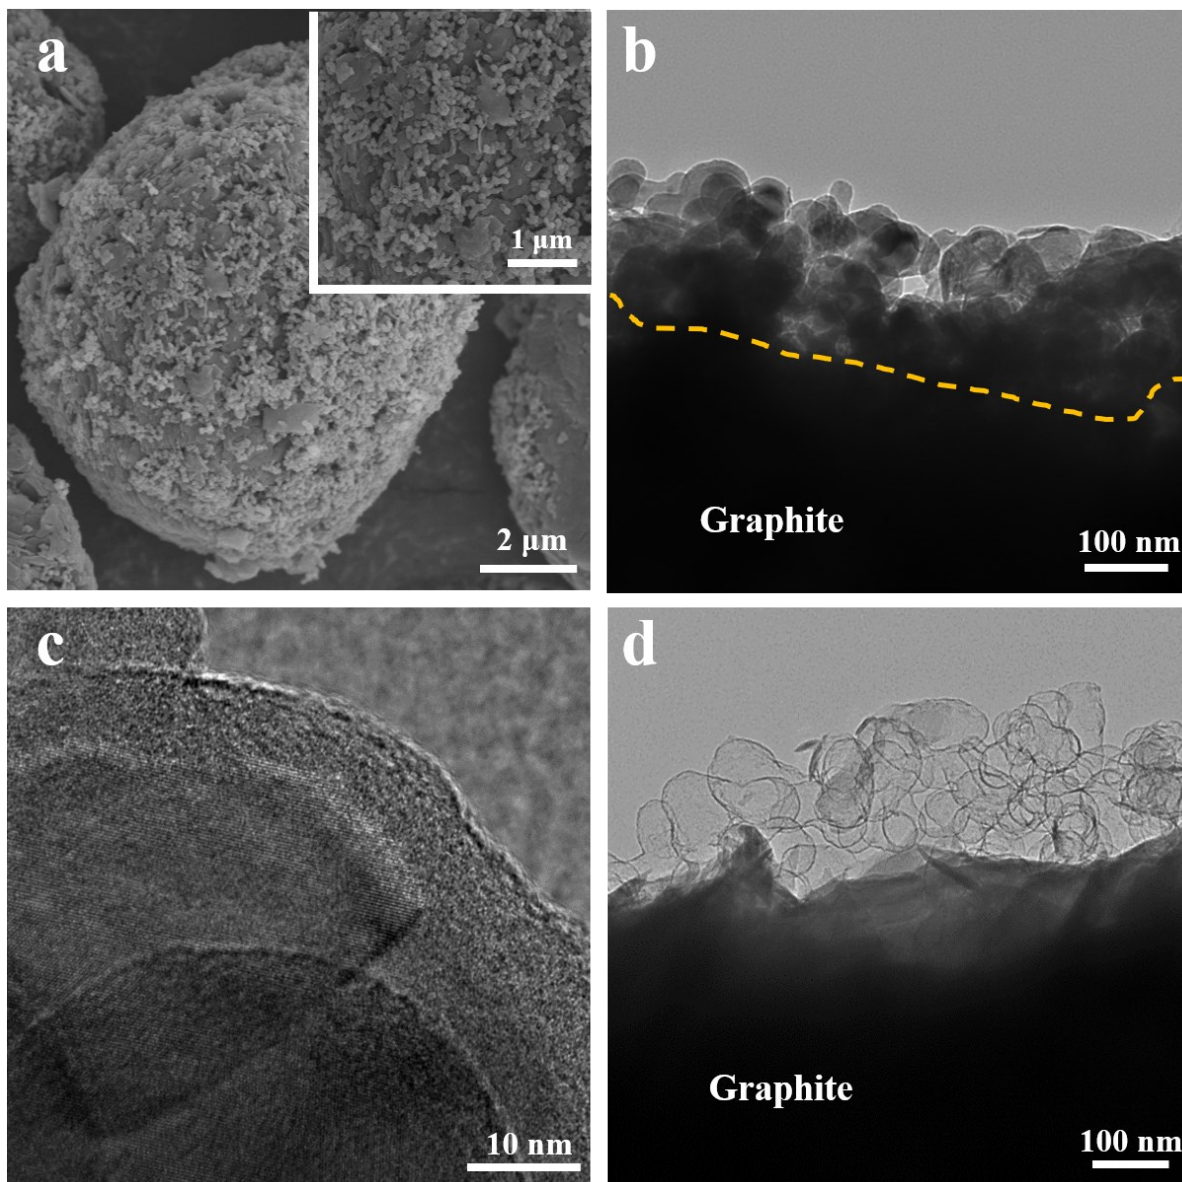

**Figure S5** (a) SEM image of G@Si/C. (b) TEM and (c) HRTEM images of G@Si/C. (d) TEM image of G@Si/C after removing Si.

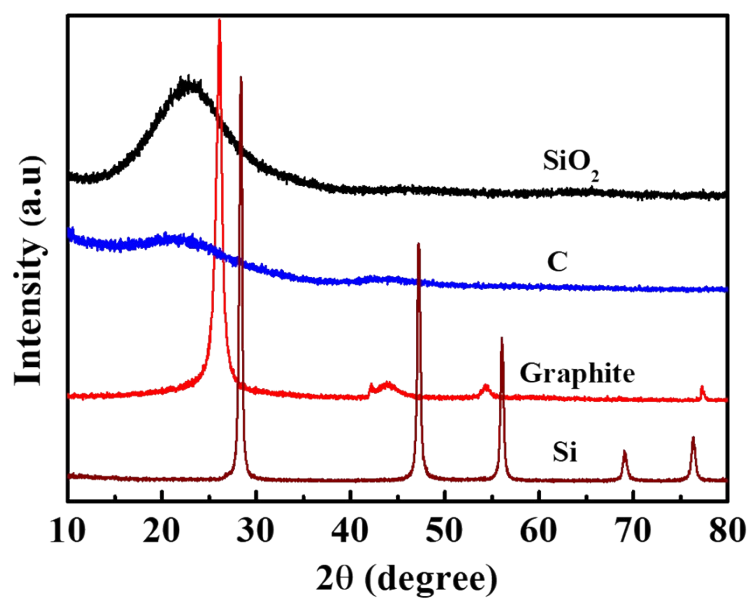

**Figure S6** XRD patterns of SiO<sub>2</sub>, amorphous carbon, graphite and Si.

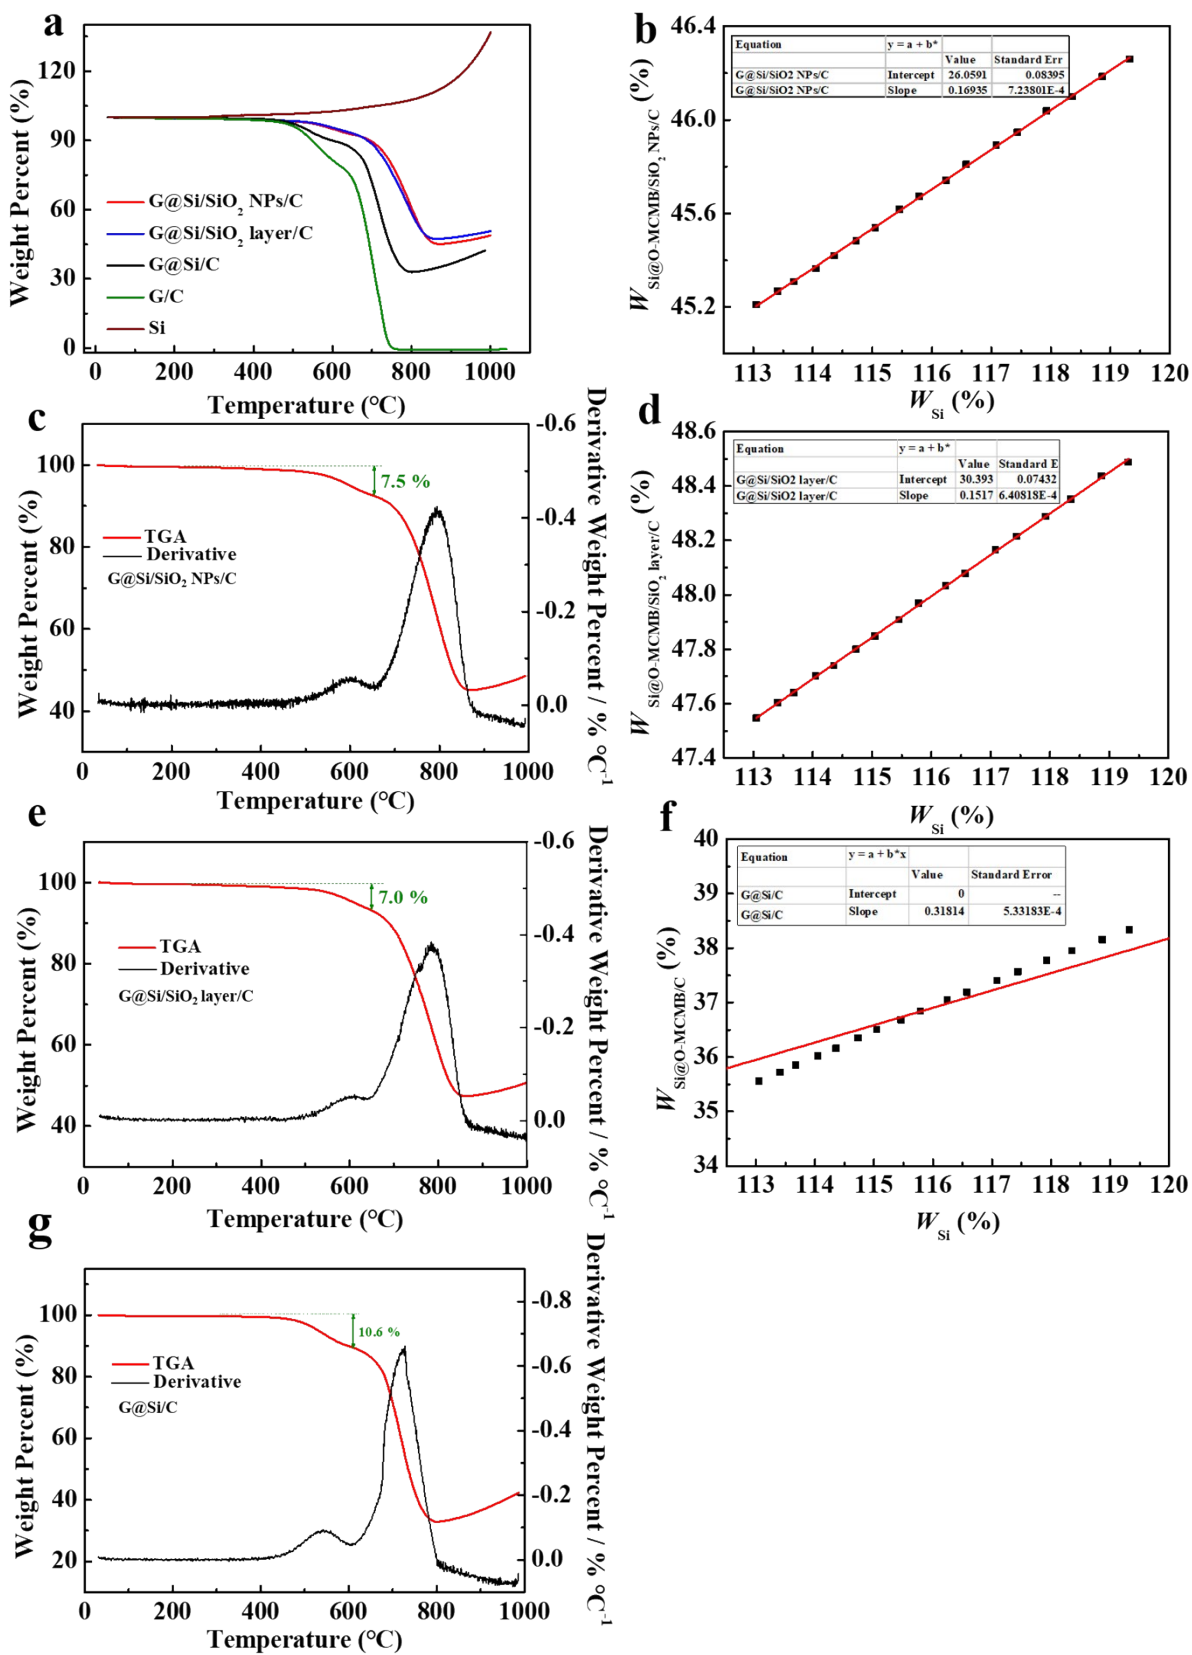

**Figure S7** (a) Thermal gravimetric analysis (TGA) curves under the oxygen atmosphere at a heating rate of 10 °C min<sup>-1</sup>. The relationship between remaining weight percent of (b) G@Si/SiO<sub>2</sub> NPs/C, (d) G@Si/SiO<sub>2</sub> layer/C and (f) G@Si/C, respectively. Weight percent and



---

derivative weight percentage curves for (c) G@Si/SiO<sub>2</sub> NPs/C, (e) G@Si/SiO<sub>2</sub> layer/C and (g) G@Si/C.

Note: The content of Si and SiO<sub>2</sub> in these composites could be calculated based on the equation:

$W_{Si}x_{Si} + W_{graphite/C}(1-x_{Si}-x_{SiO_2}) + W_{SiO_2} = W_{G@Si/SiO_2\ NPs/C}$  ( $W_{G@Si/SiO_2\ layer/C}$  or  $W_{G@Si/C}$ ), where  $W_{Si}$ ,  $W_{G/C}$  and  $W_{G@Si/SiO_2\ NPs/C}$  ( $W_{G@Si/SiO_2\ layer/C}$  or  $W_{G@Si/C}$ ) represent the remaining weight percent of SiNPs, G/C composites and G@Si/SiO<sub>2</sub> NPs/C (G@Si/SiO<sub>2</sub> layer/C or G@Si/C) composites,  $W_{SiO_2}$  is the remaining weight percent of SiO<sub>2</sub>, which is constant in all the test temperature ranges,  $x_{Si}$  denotes the content of Si. If the G/C combusts completely, in other words,  $W_{G/C}$  is equal to 0,  $x_{Si}$  and  $W_{SiO_2}$  can be obtained from the slopes and intercept of  $W_{Si}$  vs.  $W_{G@Si/SiO_2\ NPs/C}$ ,  $W_{G@Si/SiO_2\ layer/C}$  or  $W_{G@Si/C}$ . The linear fitting between  $W_{Si}$  and  $W_{G@Si/SiO_2\ NPs/C}$ ,  $W_{G@Si/SiO_2\ layer/C}$  or  $W_{G@Si/C}$  in the range of 880–930 °C are shown in Figure S6b, d and f. Accordingly, the content of Si and SiO<sub>2</sub> in the G@Si/SiO<sub>2</sub> NPs/C are determined to be 16.9% and 26.1% respectively, while that in the G@Si/SiO<sub>2</sub> layer/C hybrid spheres are 15.2% and 30.4%. In addition, the Si content of the G@Si/C is about 31.8%.

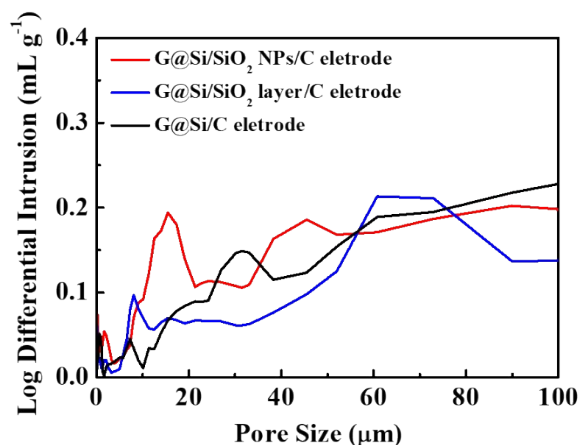

**Figure S8** Pore size distribution curves of the different electrodes obtained with MIP.

Mercury intrusion porosimetry (MIP) is used to characterize the pore structures of the as made electrodes. Figure S8 shows that all electrodes have a broad pore size distribution, ranging from about 10 nm to several hundred micrometers. The results of porosity and average pore diameter from MIP are summarized in Table S2. The higher overall porosity and larger pore size are conducive to the fast wetting of the electrodes

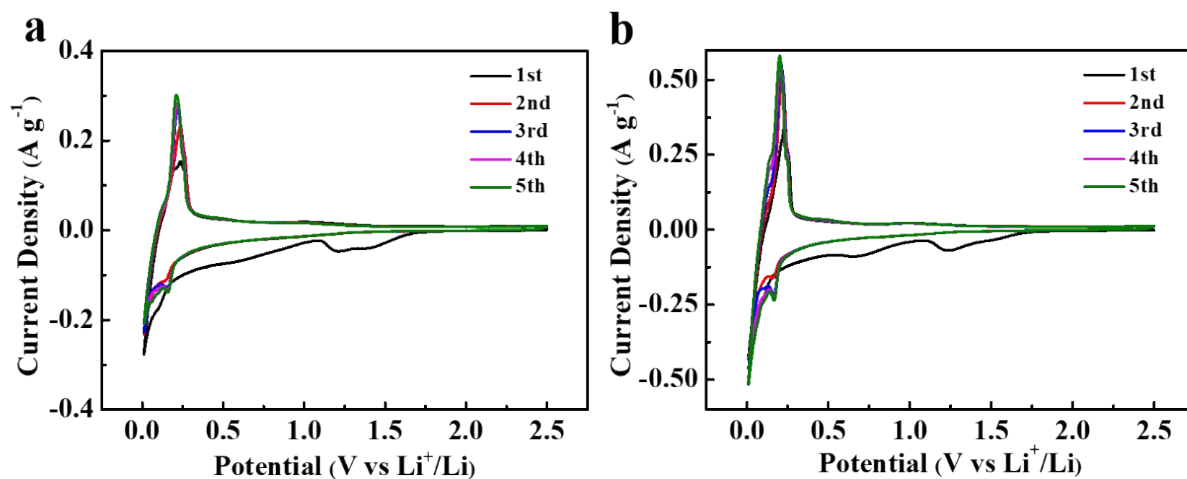

**Figure S9** Cyclic voltammetry profiles of (a) G@Si/SiO<sub>2</sub> layer/C and (b) G@Si/C.

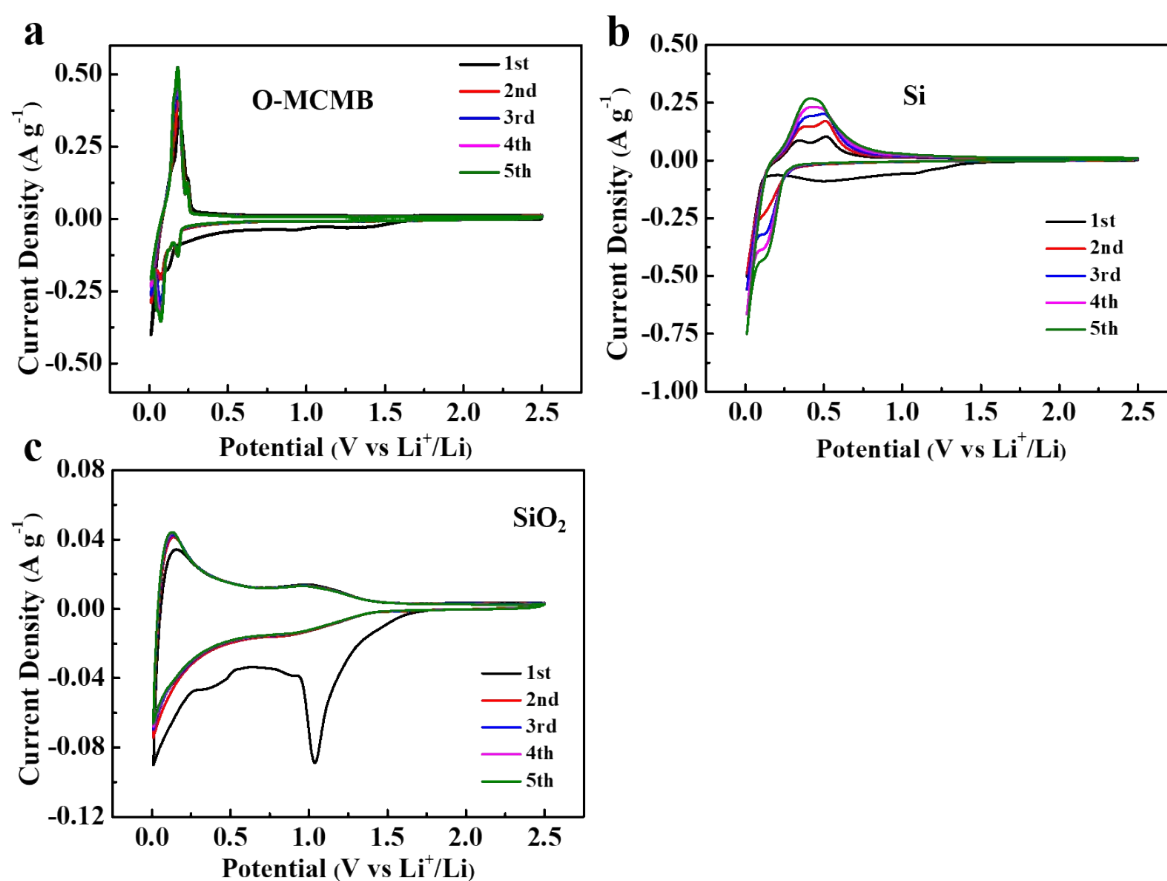

**Figure S10** Cyclic voltammetry profiles of (a) graphite, (b) Si and (c) pure SiO<sub>2</sub> electrodes.

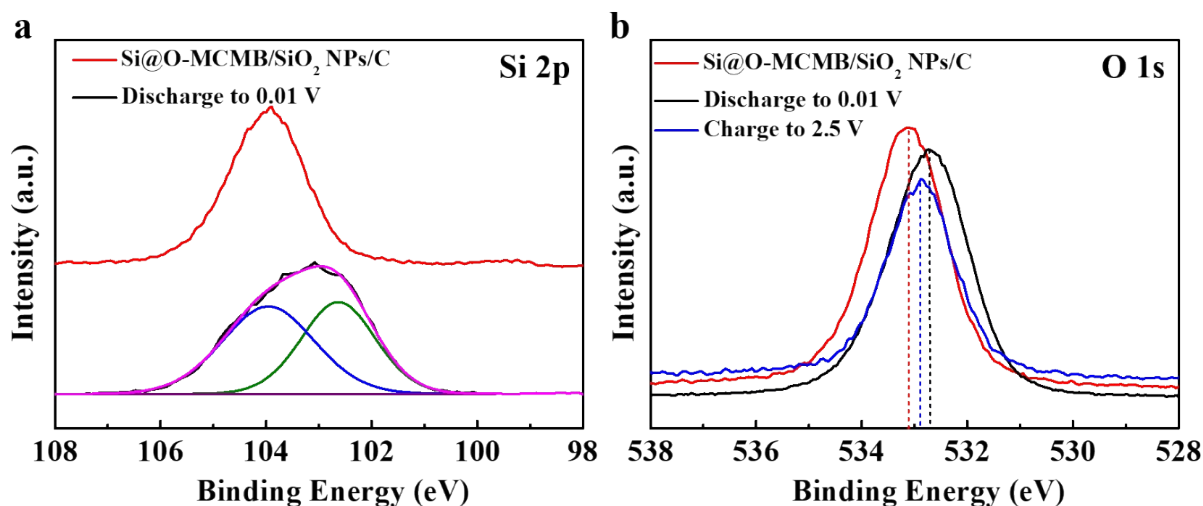

**Figure S11** The Si 2p (a) and O 1s (b) XPS spectra of the G@Si/SiO<sub>2</sub> NPs/C before and after cycle.

X-ray photoelectron spectroscopy (XPS) was employed to check the variation of the crystalline structure of SiO<sub>2</sub> during the electrochemical process. As shown in Figure S11, the peak at 103.9 eV is corresponding to the amorphous silica. After discharge, two new peaks appear, the one located at 103.4 eV is assigned to Li<sub>4</sub>SiO<sub>4</sub> and the other at 102.0 eV belongs to Li–Si alloy. As expected, the O 1s peak also shifts to low binding energy after discharge. In addition, the peak of O 1s does not fully recover to its previous position, which means that the formation of the Li<sub>4</sub>SiO<sub>4</sub> is irreversible.

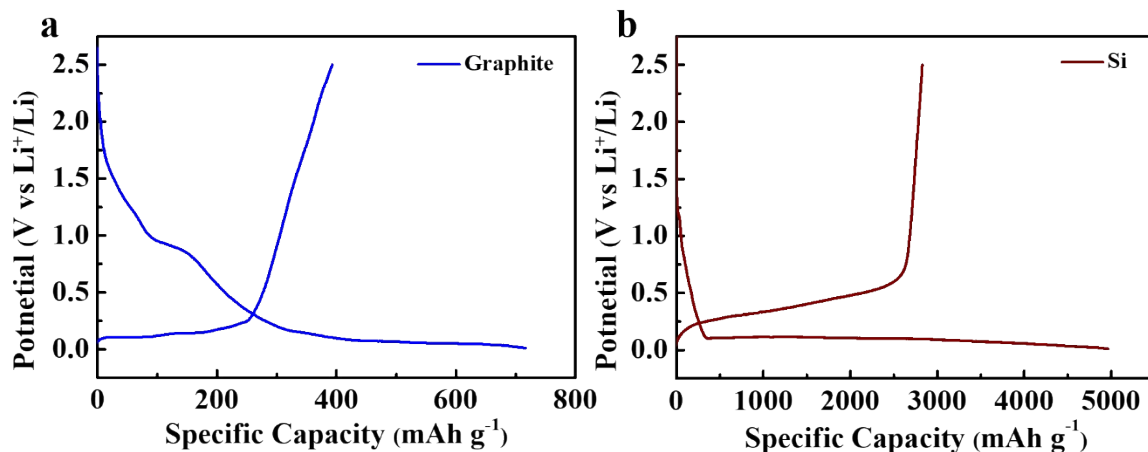

**Figure S12** Initial discharge-charge voltage profiles of (a) graphite after treated with mixed acid and (b) Si.

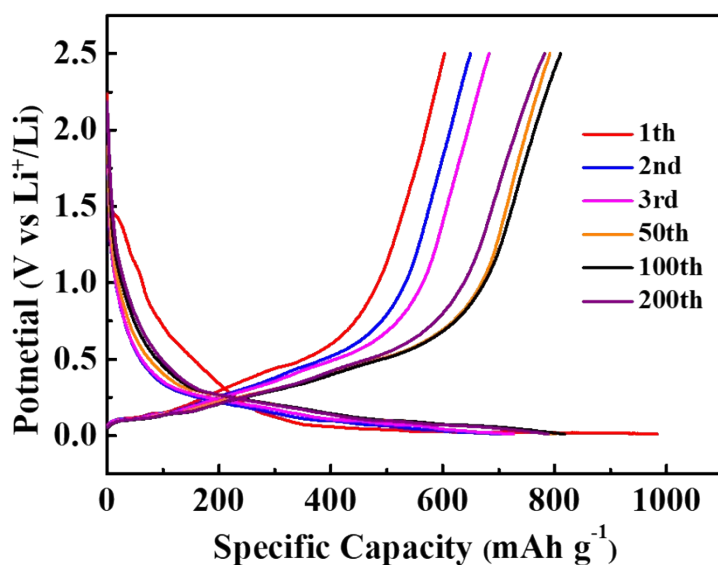

**Figure S13** Voltage profiles of the G@Si/SiO<sub>2</sub> NPs/C composites for the 1st, 2nd, 3rd, 50th, 100th, and 200th cycles.

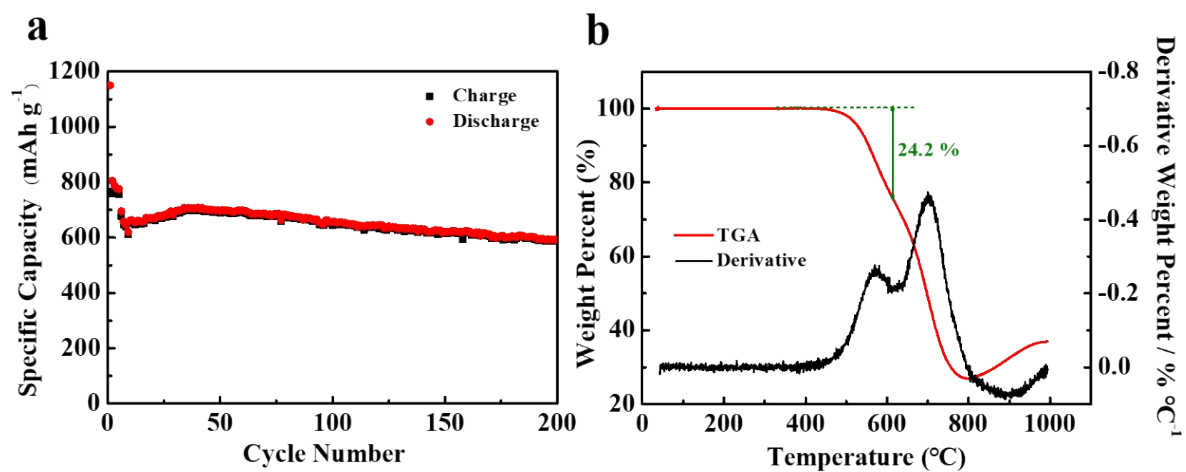

**Figure S14** (a) Cycling performance of G@Si/C with a high carbon content of 24.2%. (b) The weight percent and derivative weight percentage curves.

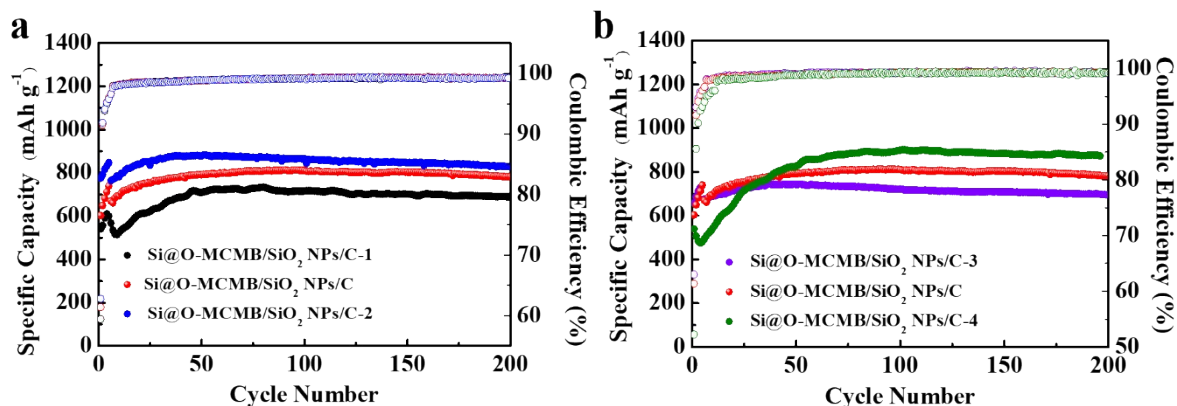

**Figure S15** Cycling performances of G@Si/SiO<sub>2</sub> NPs/C with different components.

The G@Si/SiO<sub>2</sub> NPs/C composites with different components are also prepared (Figure S16 and Table S1). When increasing the amount of Si, the G@Si/SiO<sub>2</sub> NPs/C-2 composites show a higher specific capacity of 884 mAh g<sup>-1</sup> and a slightly more rapid capacity fading at 200 mA g<sup>-1</sup> compared to the G@Si/SiO<sub>2</sub> NPs/C and G@Si/SiO<sub>2</sub> NPs/C-1 composites with the lower amount of Si (Figure S15 a).

As increasing the amount of SiO<sub>2</sub>, the specific capacity of G@Si/SiO<sub>2</sub> NPs/C-4 increases to 891 mAh g<sup>-1</sup> and the capacity retention is almost 100% after 200 cycles. While too much SiO<sub>2</sub> and too little amorphous carbon prolong the activation time (Figure S15 b).

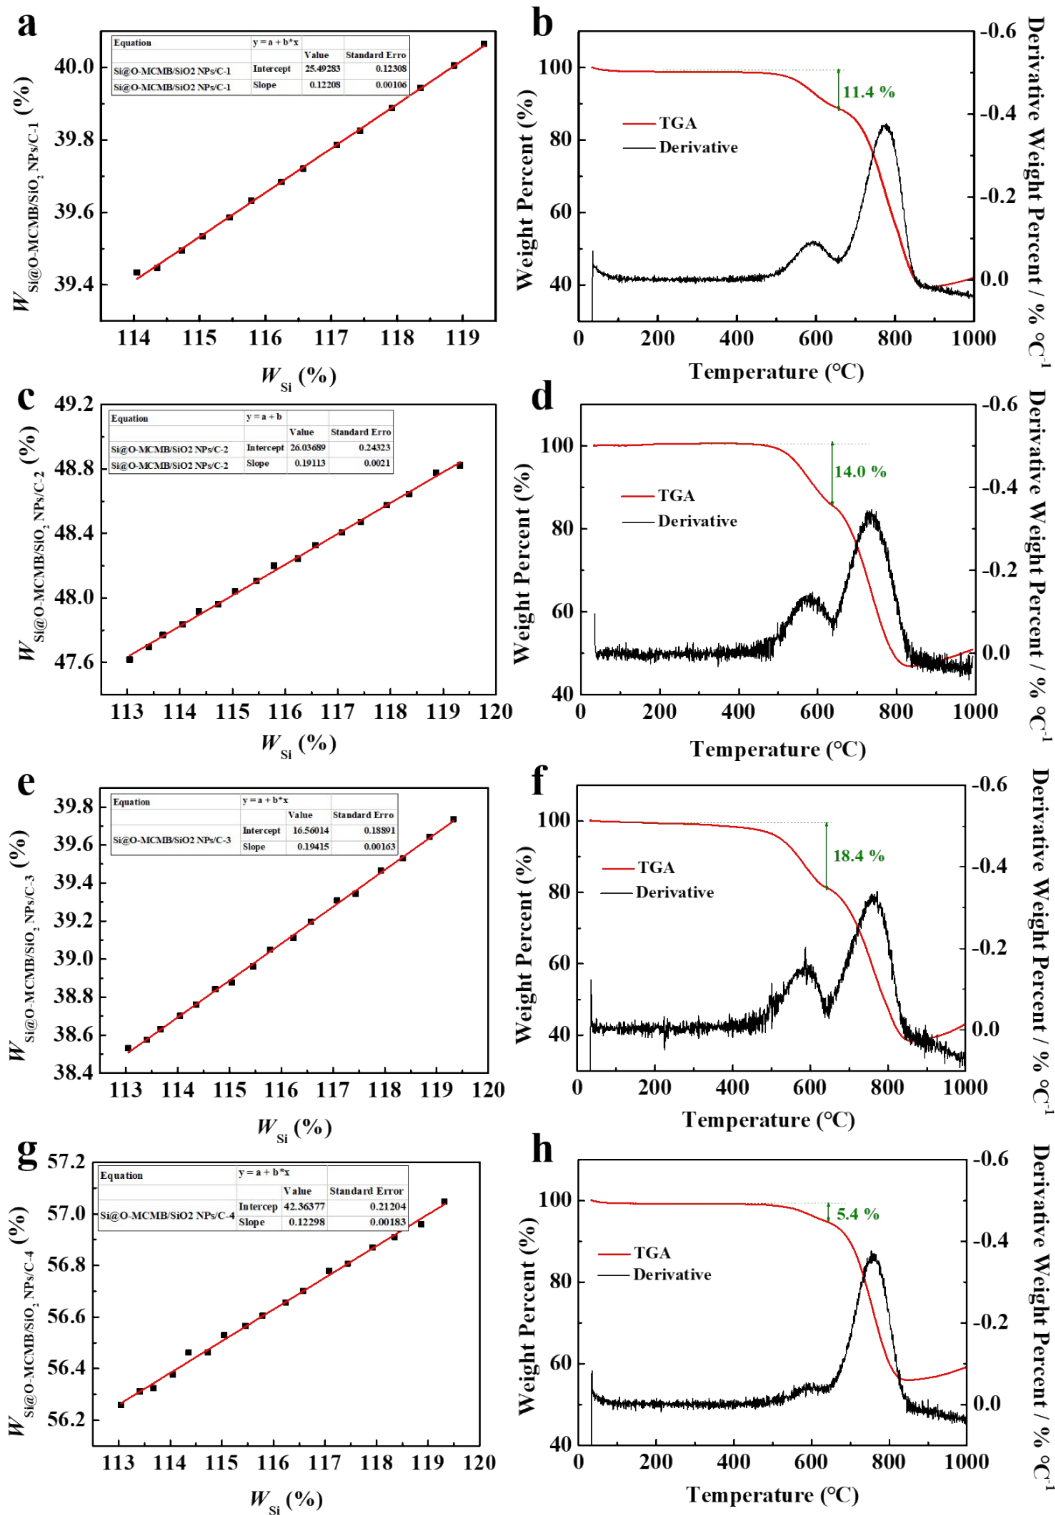

**Figure S16** The relationship between remaining weight percent of (a) G@Si/SiO<sub>2</sub> NPs/C-1, (c) G@Si/SiO<sub>2</sub> NPs/C-2, (e) G@Si/SiO<sub>2</sub> NPs/C-3 and (g) G@Si/SiO<sub>2</sub> NPs/C-4, respectively. Weight percent and derivative weight percentage curves for (d) G@Si/SiO<sub>2</sub> NPs/C-1, (e) G@Si/SiO<sub>2</sub> NPs/C-2, (f) G@Si/SiO<sub>2</sub> NPs/C-3 and (h) G@Si/SiO<sub>2</sub> NPs/C-4.



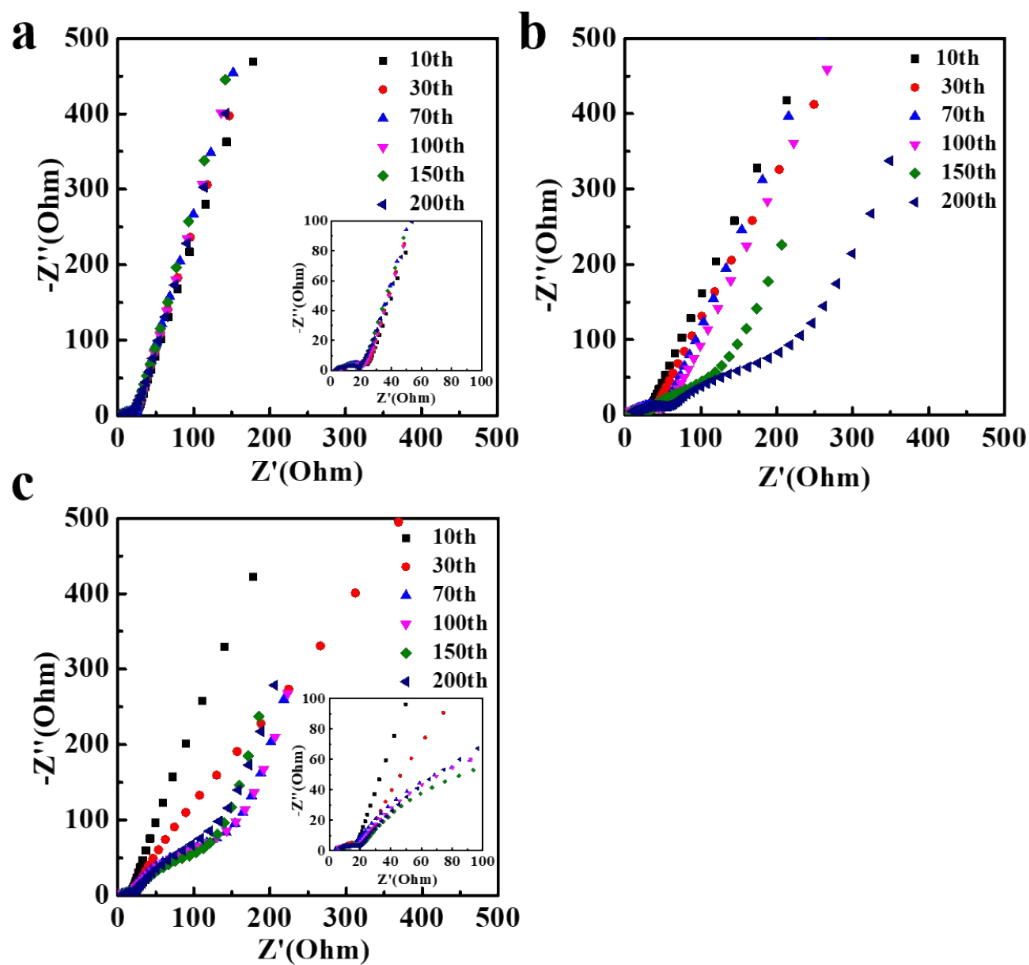

**Figure S17** Nyquist plots of the EIS spectra of the (a) G@Si/SiO<sub>2</sub> NPs/C, (b) G@Si/SiO<sub>2</sub> layer/C and (c) G@Si/C electrodes in the delithiation stage after different cycles at 0.5 A g<sup>-1</sup>.

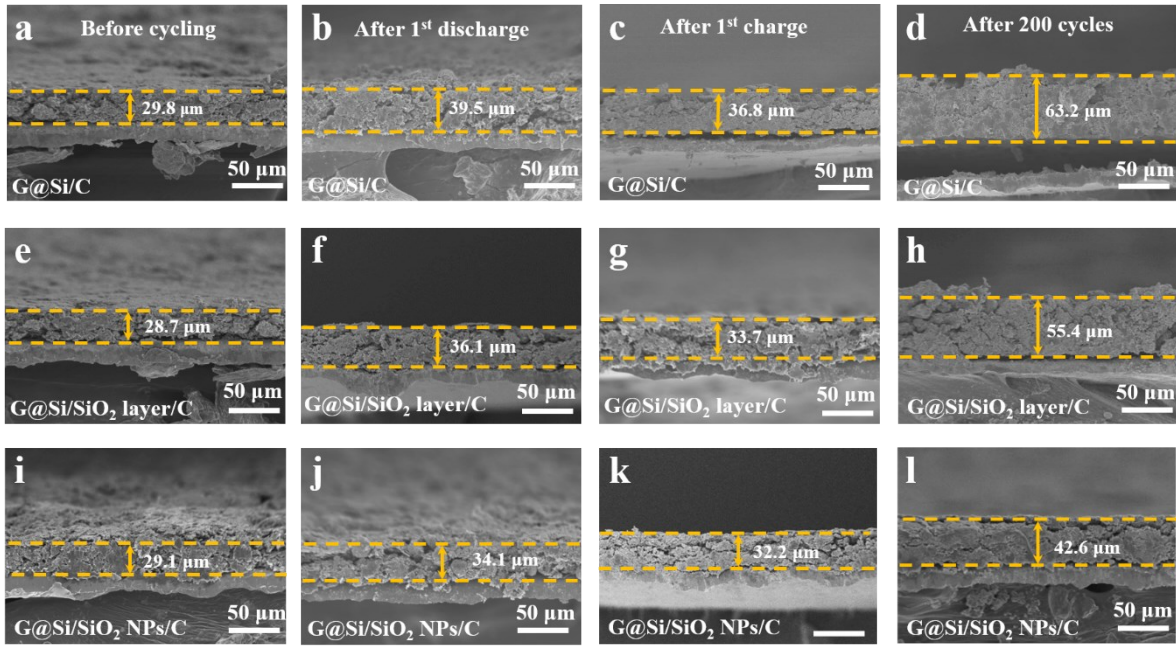

**Figure S18** Cross-sectional SEM images of G@Si/C electrodes (a) before cycles, (b) after 1st discharge, (c) after 1st charge and (d) after 200th charge. Cross-sectional SEM images of G@Si/SiO<sub>2</sub> layer/C electrodes (e) before cycles, (f) after 1st discharge, (g) after 1st charge and (k) after 200th charge. Cross-sectional SEM images of G@Si/SiO<sub>2</sub> NPs/C electrodes (i) before cycles, (j) after 1st discharge, (k) after 1st charge and (l) after 200th charge.

After first discharge, the G@Si/SiO<sub>2</sub> NPs/C anode with a thickness of 29.1 μm expands to about 17.2% (34.1 μm) in height, which is much lower than 25.8% for G@Si/SiO<sub>2</sub> layer/C and 32.6% for G@Si/C electrodes. After a subsequent charge process, the thickness of the G@Si/SiO<sub>2</sub> NPs/C composite anode slightly decreased to 32.2 μm, corresponding to 10.7%, which is also a lower value compared with the 17.4% of the G@Si/SiO<sub>2</sub> layer/C and 23.5% of the G@Si/C anode. After a long cycle (200 cycles at the charge state), the G@Si/C electrode exhibits a large thickness increase of 112% with particles delamination. While the G@Si/SiO<sub>2</sub> NPs/C shows the smallest volume expansion (46%) with no obvious variation of the electrode surface after cycles, implying that the conformal coated carbon on SiO<sub>2</sub> NPs in the G@Si/SiO<sub>2</sub> NPs/C can tolerate the volume expansion more effectively than outermost carbon layer in G@Si/SiO<sub>2</sub> layer/C during the lithiation/delithiation process, thereby retaining structural stability after long cycling.

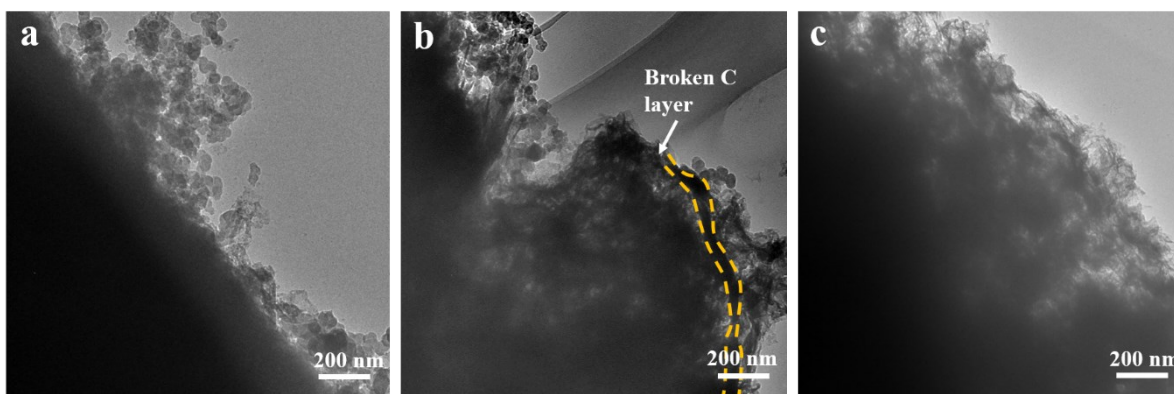

**Figure S19** TEM of the (a) G@Si/C, (b) G@Si/SiO<sub>2</sub> layer/C and (c) G@Si/SiO<sub>2</sub> NPs/C electrodes after 200 cycles at 0.5 A g<sup>-1</sup>.

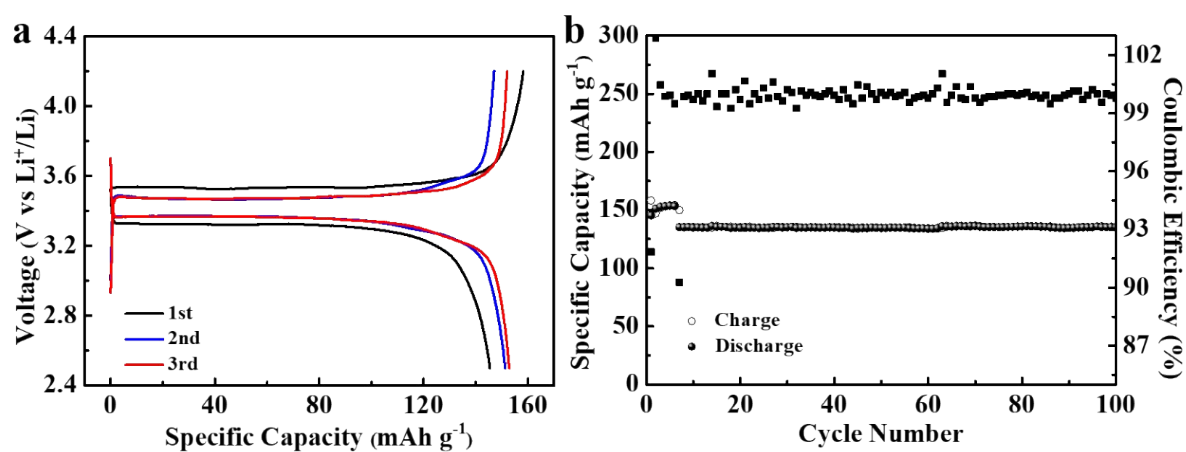

**Figure S20** (a) Voltage profiles of LFP half cells. (b) The Cycling performance of the LFP half cells tested at 0.2 C for the first five cycles and 1 C for the later cycles.

**Table S1.** Thermogravimetric analysis of G@Si/SiO<sub>2</sub> NPs/C, G@Si/SiO<sub>2</sub> layer/C and G@Si/C composites.

|                               | Si (wt.%) | SiO <sub>2</sub> (wt.%) | graphite (wt.%) | C (wt.%) |
|-------------------------------|-----------|-------------------------|-----------------|----------|
| G@Si/SiO <sub>2</sub> NPs/C   | 16.9      | 26.1                    | 49.3            | 7.5      |
| G@Si/SiO <sub>2</sub> layer/C | 15.2      | 30.4                    | 47.4            | 7.0      |
| G@Si/C                        | 31.8      | 0                       | 57.6            | 10.6     |
| G@Si/SiO <sub>2</sub> NPs/C-1 | 12.2      | 25.5                    | 50.9            | 11.4     |
| G@Si/SiO <sub>2</sub> NPs/C-2 | 19.1      | 26.0                    | 40.8            | 14.0     |
| G@Si/SiO <sub>2</sub> NPs/C-3 | 19.6      | 16.4                    | 45.6            | 18.4     |
| G@Si/SiO <sub>2</sub> NPs/C-4 | 12.3      | 42.4                    | 39.9            | 5.4      |

**Table S2.** Results summary for total intrusion volume, average pore diameter and porosity from mercury intrusion porosimetry (MIP).

|                               | Total Intrusion Volume<br>(mL g <sup>-1</sup> ) | Average Pore Diameter<br>(nm) | Porosity<br>(%) |
|-------------------------------|-------------------------------------------------|-------------------------------|-----------------|
| G@Si/SiO <sub>2</sub> NPs/C   | 0.4542                                          | 121.3                         | 52.6            |
| G@Si/SiO <sub>2</sub> layer/C | 0.3311                                          | 155.4                         | 46.3            |
| G@Si/C                        | 0.6258                                          | 168.6                         | 56.4            |

**Table S3.** Electrochemical performances comparison of Si-graphite anode materials in LIBs.

| Materials                                | Current<br>(A g <sup>-1</sup> ) | Capacity<br>(mAh g <sup>-1</sup> ) | Cycle<br>Number | Retention<br>(%) | Ref.                 |
|------------------------------------------|---------------------------------|------------------------------------|-----------------|------------------|----------------------|
| <b>G@Si/SiO<sub>2</sub> NPs/C</b>        | <b>0.2</b>                      | <b>~800</b>                        | <b>200</b>      | <b>96</b>        | <b>This<br/>work</b> |
|                                          | <b>0.5</b>                      | <b>~600</b>                        | <b>800</b>      | <b>92</b>        |                      |
| <b>G@Si/SiO<sub>2</sub> layer/C</b>      | <b>0.2</b>                      | <b>~800</b>                        | <b>200</b>      | <b>88</b>        |                      |
| Si-nanolayer-embedded<br>graphite/carbon | 0.25                            | ~500                               | 100             | 96               | 1                    |
| Si/carbon/graphite                       | 0.13                            | 568                                | 100             | 83.8             | 2                    |
| Si@O-MCMB/C                              | 0.1                             | 560                                | 200             | 92.8             | 3                    |
| MCMB@Si@C                                | 0.1                             | 632                                | 100             | 91.1             | 4                    |
| SGCpitch                                 | 0.25                            | 523                                | 50              | 97.5             | 5                    |
| Si/graphite/pyrolytic carbon             | 0.5                             | 610                                | 300             | 83.6             | 6                    |
| Silicon/carbon/natural graphite          | 0.1                             | 471.5                              | 100             | 87.9             | 7                    |
| Polymer-carbon coated Si-on-<br>graphite | 0.09                            | 480                                | 200             | 95               | 8                    |
| Si/pyrolyzed carbon@ graphite            | 0.1                             | 550                                | 100             | 93.75            | 9                    |
| Si/graphite/carbon                       | 1                               | 640                                | 50              | 87.6             | 10                   |
| Si/C microspheres                        | 0.3                             | ~600                               | 500             | 83.3             | 11                   |

## Reference

1. M. Ko, S. Chae, J. Ma, N. Kim, H.-W. Lee, Y. Cui and J. Cho, Scalable synthesis of silicon-nanolayer-embedded graphite for high-energy lithium-ion batteries, *Nat. Energy*, 2016, **1**, 16113-16121.
2. S.Y. Kim, J. Lee, B.H. Kim, Y.J. Kim, K.S. Yang and M.S. Park, Facile Synthesis of Carbon-Coated Silicon/Graphite Spherical Composites for High-Performance Lithium-Ion Batteries, *ACS Appl. Mater. Interfaces*, 2016, **8**, 12109-12117.
3. H. Liu, Z. Shan, W. Huang, D. Wang, Z. Lin, Z. Cao, P. Chen, S. Meng and L. Chen, Self-Assembly of Silicon@Oxidized Mesocarbon Microbeads Encapsulated in Carbon as Anode Material for Lithium-Ion Batteries, *ACS Appl. Mater. Interfaces*, 2018, **10**, 4715-4725.

- 
4. Y. Lin, Y. Chen, Y. Zhang, J. Jiang, Y. He, Y. Lei, N. Du and D. Yang, Wet-chemical synthesized MCMB@ Si@ C microspheres for high-performance lithium-ion battery anodes, *Chem. Commun.*, 2018, **54**, 9466-9469.
  5. S.-H. Choi, G. Nam, S. Chae, D. Kim, N. Kim, W.S. Kim, J. Ma, J. Sung, S.M. Han, M. Ko, H.-W. Lee and J. Cho, Robust Pitch on Silicon Nanolayer-Embedded Graphite for Suppressing Undesirable Volume Expansion, *Adv. Energy Mater.*, 2019, **9**, 1803121-1803131.
  6. D. Sui, Y. Xie, W. Zhao, H. Zhang, Y. Zhou, X. Qin, Y. Ma, Y. Yang and Y. Chen, A high-performance ternary Si composite anode material with crystal graphite core and amorphous carbon shell, *J. Power Sources*, 2018, **384**, 328-333.
  7. A. Wang, F. Liu, Z. Wang and X. Liu, Self-assembly of silicon/carbon hybrids and natural graphite as anode materials for lithium-ion batteries, *RSC Adv.*, 2016, **6**, 104995-105002
  8. F. S. Li, Y. S. Wu, J. Chou and N. L. Wu, A dimensionally stable and fast-discharging graphite–silicon composite Li-ion battery anode enabled by electrostatically self-assembled multifunctional polymer-blend coating, *Chem. Commun.*, 2015, **51**, 8429-8431.
  9. Z. Wang, Z. Mao, L. Lai, M. Okubo, Y. Song, Y. Zhou, X. Liu and W. Huang, Sub-micron silicon/pyrolyzed carbon@ natural graphite self-assembly composite anode material for lithium-ion batteries, *Chem. Eng. J.*, 2017, **313**, 187-196.
  10. C. Xiao, P. He, J. Ren, M. Yue, Y. Huang and X. He, Walnut-structure Si–G/C materials with high coulombic efficiency for long-life lithium ion batteries, *RSC Adv.*, 2018, **8**, 27580-27586.
  11. Q. Xu, J.-Y. Li, J.-K. Sun, Y.-X. Yin, L.-J. Wan and Y.-G. Guo, Watermelon-Inspired Si/C Microspheres with Hierarchical Buffer Structures for Densely Compacted Lithium-Ion Battery Anodes, *Adv. Energy Mater.*, 2017, **7**, 1601481-1601488.
